# Supplementary material for: Sir2 and Fun30 regulate ribosomal DNA replication timing via MCM helicase positioning and nucleosome occupancy
Source: eLife journal article supplement (doi:10.7554/elife.97438), 2024-06-19
Supplement: fig2-data1 [file elife-97438-fig2-data1-v1.zip]

## Sheet: Sheet1
Figure 2 C
WT	fun30 sir2	fun30PMSIR2	fun30Sersir2	fun30	sir2
0.0880259	0.0386275	0.0459061	0.106328	0.110198	0.061789
0.0945914	0.0333935	0.0501733	0.0970498	0.0926041	0.0912726
0.109488	0.0555187				0.100952
0.0705594	0.0576041				0.0985394
0.106143					0.106359
					0.110363
Figure 2B
WT	fun30 sir2	fun30PMSIR2	fun30Sersir2	fun30	sir2	nhp10sir2	chd1sir2	swp82 sir2	isw1sir2	htl1sir2	sir2swr1	isw2sir2	irc5sir2
0.0880259	0.0386275	0.0459061	0.106328	0.110198	0.061789	0.0902948	0.075276	0.0898224	0.0686834	0.0840687	0.0639059	0.0566649	0.0750376
0.0945914	0.0333935	0.0501733	0.0970498	0.0926041	0.0912726
0.109488	0.0555187				0.100952
0.0705594	0.0576041				0.0985394
0.106143					0.106359
					0.110363
