# Supplementary material for: Sir2 and Fun30 regulate ribosomal DNA replication timing via MCM helicase positioning and nucleosome occupancy
Source: eLife journal article supplement (doi:10.7554/elife.97438), 2024-06-19
Supplement: fig2-figsupp1-data1 [file elife-97438-fig2-figsupp1-data1-v1.zip]

## Sheet: Sheet1
fob1 35 copy	fob1 180 copy	WT	sir2	sir2 fun30	fun30
32.3789	178.845	126.623	159.346	39.545	139.185
29.7919	179.967	163.137	159.978	39.6677	156.351
28.6871	180.492	161.114	149.906	40.2467	147.705
31.0854	179.87	160.973	152.14	33.9838	145.967
		173.087	151.538	40.3661	146.906
		174.177	151.486	39.2424	135.831
30.4858	179.793	159.852	154.066	38.8419	145.324
