# Supplementary material for: Sir2 and Fun30 regulate ribosomal DNA replication timing via MCM helicase positioning and nucleosome occupancy
Source: eLife journal article supplement (doi:10.7554/elife.97438), 2024-06-19
Supplement: fig2-figsupp3-data1 [file elife-97438-fig2-figsupp3-data1-v1.zip]

## Sheet: Data for the fob1 series
fob1
bwa_16630_G1_119_copies_fob1_AA22_S21	41320143	4253760	0.102946	231010_M00492_0172_000000000-L6RB4	bwa_16630_S_119_copies_fob1_AA23_S22	41411579	4306532	0.103993	231010_M00492_0172_000000000-L6RB4	1.01017	Mat A, Fob1::KanMX, YDR110W, 11,C11	16630	NA
bwa_17549_G1_hml_fob1_198copies_AA20_S15	44094521	4701126	0.106615	231109_M00492_0178_000000000-LBNYB	bwa_17549_S_hml_fob1_198copies_AA21_S16	235971854	27414759	0.116178	231109_M00492_0178_000000000-LBNYB	1.0897	Mat A, Fob1::KanMX, YDR110W, 11,C11, hml::HYG (Final count of rDNA: 198 copies)	17549	NA
bwa_17550_G1_hml_fob1_191copies_AA09_S5	45734473	4680227	0.102335	231109_M00492_0178_000000000-LBNYB	bwa_17550_S_hml_fob1_191copies_AA10_S6	31690842	3363159	0.106124	231109_M00492_0178_000000000-LBNYB	1.03703	Mat A, Fob1::KanMX, YDR110W, 11,C11, hml::HYG (Final count of rDNA: 191 copies)	17550	NA
bwa_17542_G1_hml_fob1_fun30_122copies_AA22_S17	290858960	30004795	0.103159	231109_M00492_0178_000000000-LBNYB	bwa_17542_S_hml_fob1_fun30_122copies_AA23_S18	26761952	2684648	0.100316	231109_M00492_0178_000000000-LBNYB	0.972437	hml_fob1_fun30_122copies	17542	NA
bwa_17477_G1_hml_fun30_fob1_152copies_AA07_S3	142220940	14160348	0.0995658	231201_VH00699_398_AAF7GV5M5	bwa_17477_S_hml_fun30_fob1_152copies_AA23_S4	130164299	13342877	0.102508	231201_VH00699_398_AAF7GV5M5	1.02955	Mat A, Fob1::KanMX, YDR110W, 11,C11 fun30::HYG, hml::NAT (Final count of rDNA: 152 copies)	17477	NA
bwa_17548_G1_hml_fob1_sir2_fun30_158copies_AA18_S13	42582999	4423890	0.103889	231109_M00492_0178_000000000-LBNYB	bwa_17548_S_hml_fob1_sir2_fun30_158copies_AA19_S14	30585754	3517960	0.11502	231109_M00492_0178_000000000-LBNYB	1.10714	Mat A, Fob1::KanMX, YDR110W, 11,C11 fun30::HYG, hml::NAT, sir2::LEU (Final count of rDNA: 158 copies)	17548	NA
	bwa_17548_1_fob1_fun30_sir2_rDNA158_G1_Sseq_AA33_KLP20240618_5_S5	7411125	105137106	0.0704901	bwa_17548_1_fob1_fun30_sir2_rDNA158_S_Sseq_AA34_KLP20240618_6_S6	5791420	69700049	0.0830906	bwa_17548_1_fob1_fun30_sir2_rDNA158_StoG1	1.17876
	bwa_17548_2_fob1_fun30_sir2_rDNA158_G1_Sseq_AA39_KLP20240618_11_S11	7006064	99391874	0.0704893	bwa_17548_2_fob1_fun30_sir2_rDNA158_S_Sseq_AA40_KLP20240618_12_S12	11377272	136514455	0.0833412	bwa_17548_2_fob1_fun30_sir2_rDNA158_StoG1	1.18232
	bwa_17548_3_fob1_fun30_sir2_rDNA158_G1_Sseq_AA46_KLP20240618_17_S17	5097146	70714335	0.0720808	bwa_17548_3_fob1_fun30_sir2_rDNA158_S_Sseq_AA47_KLP20240618_18_S18	6669406	80770853	0.0825719	bwa_17548_3_fob1_fun30_sir2_rDNA158_StoG1	1.14555
										1.15344
										0.035028
										0.00836434
	bwa_17561_1_fob1_sir2_rDNA177_G1_Sseq_AA29_KLP20240618_1_S1	6414938	66625887	0.096283	bwa_17561_1_fob1_sir2_rDNA177_S_Sseq_AA30_KLP20240618_2_S2	9406313	77362924	0.121587	bwa_17561_1_fob1_sir2_rDNA177_StoG1	1.26281
	bwa_17561_3_fob1_sir2_rDNA177_G1_Sseq_AA42_KLP20240618_13_S13	10958162	109992154	0.0996268	bwa_17561_3_fob1_sir2_rDNA177_S_Sseq_AA43_KLP20240618_14_S14	15722947	131032556	0.119993	bwa_17561_3_fob1_sir2_rDNA177_StoG1	1.20442
	bwa_17562_1_fob1_sir2_rDNA179_G1_Sseq_AA31_KLP20240618_3_S3	7728755	78398392	0.0985831	bwa_17562_1_fob1_sir2_rDNA179_S_Sseq_AA32_KLP20240618_4_S4	8848797	72559515	0.121952	bwa_17562_1_fob1_sir2_rDNA179_StoG1	1.23705
	bwa_17562_2_fob1_sir2_rDNA179_G1_Sseq_AA37_KLP20240618_9_S9	9189996	91469210	0.100471	bwa_17562_2_fob1_sir2_rDNA179_S_Sseq_AA38_KLP20240618_10_S10	11515337	93142005	0.123632	bwa_17562_2_fob1_sir2_rDNA179_StoG1	1.23053
	bwa_17562_3_fob1_sir2_rDNA179_G1_Sseq_AA44_KLP20240618_15_S15	14363321	143645291	0.0999916	bwa_17562_3_fob1_sir2_rDNA179_S_Sseq_AA45_KLP20240618_16_S16	10885523	87297623	0.124694	bwa_17562_3_fob1_sir2_rDNA179_StoG1	1.24705
bwa_17561_G1_hml_fob1_sir2_177copies_AA12_S7	150884810	16548329	0.109675	231201_VH00699_398_AAF7GV5M5	bwa_17561_S_hml_fob1_sir2_177copies_AA13_S8	165510431	22901738	0.13837	231201_VH00699_398_AAF7GV5M5	1.26164	Mat A, Fob1::KanMX, YDR110W, 11,C11, hml::HYG, sir2::LEU Final count of rDNA: 177 copies)¬†	17561	NA
										1.24058
										0.00836434
										0.02191

## Sheet: Figure 2 supplement 3
fob1 180	fob1 sir2	fob1 sir2 fun30	fob1 fun30
1.01017	1.26281	1.10714	0.972437
1.0897	1.20442	1.17876	1.02955
1.03703	1.23705	1.18232
	1.23053	1.14555
	1.24705
	1.26164
