# Supplementary material for: Sir2 and Fun30 regulate ribosomal DNA replication timing via MCM helicase positioning and nucleosome occupancy
Source: eLife journal article supplement (doi:10.7554/elife.97438), 2024-06-19
Supplement: fig4-data3 [file Figure 4C source data.xlsx]

## Sheet: fob1 series Exp.1
Genotype	Area	Value	Background subtracted	Bubble/sARS ratio
fob1 sir2	Bubble	51932349	41183117	18.3905
fob1 sir2	Bubble Background	10749232
fob1 sir2	Single ARS	6534584	2239371
fob1 sir2	Single ARS Background	4295213
fob1 sir2 fun30	Bubble	29149539	18962906	3.67386
fob1 sir2 fun30	Bubble Background	10186633
fob1 sir2 fun30	Single ARS	9495334	5161582
fob1 sir2 fun30	Single ARS Background	4333752

## Sheet: fob1 series Exp. 2
Genotype	Area	Value	Background subtracted	Bubble/sARS ratio
fob1 sir2	Bubble	3719035	1364402	15.2956
fob1 sir2	Bubble Background	2354633
fob1 sir2	Single ARS	530718	89202
fob1 sir2	Single ARS Background	441516
fob1 sir2 fun30	Bubble	2741618	338590	4.73526
fob1 sir2 fun30	Bubble Background	2403028
fob1 sir2 fun30	Single ARS	499364	71504
fob1 sir2 fun30	Single ARS Background	427860
