# Supplementary material for: Sir2 and Fun30 regulate ribosomal DNA replication timing via MCM helicase positioning and nucleosome occupancy
Source: eLife journal article supplement (doi:10.7554/elife.97438), 2024-06-19
Supplement: fig4-data6 [file elife-97438-fig4-data6-v1.zip]

## Sheet: WT rARS
Time in HU	Area	Value	Bacground Subtracted	Bubble/sARS
20 min	Bubble arc	33604329	3635118	0.312471
20 min	Bubble arc Back	29969211
20 min	sARS	25001348	11633453
20 min	sARS Back	13367895
30 min	Bubble arc	25804875	7517738	1.33352
30 min	Bubble arc Back	18287137
30 min	sARS	11703434	5637531
30 min	sARS Back	6065903
60 min	Bubble arc	27199002	10248352	0.901215
60 min	Bubble arc Back	16950650
60 min	sARS	17471837	11371707
60 min	sARS Back	6100130
90 min	Bubble arc	23394680	7077090	0.526759
90 min	Bubble arc Back	16317590
90 min	sARS	19334124	13435145
90 min	sARS Back	5898979

## Sheet: sir2 rARS
Time in HU	Area	Value	Bacground Subtracted	Bubble/sARS
20 min	Bubble arc	20233834	8117874	2.02345
20 min	Bubble arc Back	12115960
20 min	sARS	9981759	4011894
20 min	sARS Back	5969865
30 min	Bubble arc	27700311	20426854	5.18888
30 min	Bubble arc Back	7273457
30 min	sARS	8833376	3936663
30 min	sARS Back	4896713
60 min	Bubble arc	40486380	32970197	7.42338
60 min	Bubble arc Back	7516183
60 min	sARS	10320130	4441400
60 min	sARS Back	5878730
90 min	Bubble arc	34263466	26773025	5.45828
90 min	Bubble arc Back	7490441
90 min	sARS	11368866	4905028
90 min	sARS Back	6463838

## Sheet: sir2 fun30 rARS
Time in HU	Area	Value	Bacground Subtracted	Bubble/sARS
20 min	Bubble arc	13669687	2075840	0.731714
20 min	Bubble arc Back	11593847
20 min	sARS	5798022	2836955
20 min	sARS Back	2961067
30 min	Bubble arc	22305760	9422483	2.27239
30 min	Bubble arc Back	12883277
30 min	sARS	7388988	4146500
30 min	sARS Back	3242488
60 min	Bubble arc	21408757	9030707	1.38885
60 min	Bubble arc Back	12378050
60 min	sARS	9496693	6502289
60 min	sARS Back	2994404
90 min	Bubble arc	16572992	4987416	0.986474
90 min	Bubble arc Back	11585576
90 min	sARS	7947611	5055800
90 min	sARS Back	2891811
							wt	sir2	sir2 fun30	fun30
						20'	0.31	2	0.7		0.0294774	0.0396098
						30'	1.3	5.2	2.3	0.4
						60'	0.9	7.4	1.3	1.3
						90'	0.5	5.4	0.9	1.1
							0.7525	5	1.3	0.933333
							0.440104	2.23308	0.711805
									0.0396098

## Sheet: fun30 rARS
Time in HU	Area	Value	Bacground Subtracted	Bubble/sARS
20 min	Bubble			ND
20 min	Bubble Back
20 min	SARS	45880168	18096286
20 min	SARS Back	27783882
30 min	Bubble	39531464	8816800	0.407392
30 min	Bubble Back	30714664
30 min	SARS	36291875	21642080
30 min	SARS Back	14649795
60 min	Bubble	43809616	12873209	1.32549
60 min	Bubble Back	30936407
60 min	SARS	24140664	9712035
60 min	SARS Back	14428629
90 min	Bubble	54732081	12231761	1.06323
90 min	Bubble Back	42500320
90 min	SARS	27861551	11504297
90 min	SARS Back	16357254

## Sheet: WT ARS305
Time in HU	Area	Value	Bacground Subtracted	Bubble/1N	Normalized to WT 20 min
20 min	1N	9757531	7972867
20 min	1N Background	1784664
20 min	Bubble	7086172	753568	0.0945166	1
20 min	Bubble Background	6332604
30 min	1N	9465774	7474408
30 min	1N Background	1991366
30 min	Bubble	8779611	2272807	0.304079	3.2172
30 min	Bubble Background	6506804
60 min	1N	8218180	6380941
60 min	1N Background	1837239
60 min	Bubble	9047111	2861820	0.448495	4.74515
60 min	Bubble Background	6185291
90 min	1N	7378055	5483464
90 min	1N Background	1894591
90 min	Bubble	7643065	1769837	0.322759	3.41484
90 min	Bubble Background	5873228

## Sheet: sir2 ARS305
Time in HU	Area	Value	Bacground Subtracted	Bubble/1N	Normalized to WT 20 min
20 min	1N	11976575	7701610
20 min	1N Background	4274965
20 min	Bubble			ND	ND
20 min	Bubble Background
30 min	1N	12109033	7491230
30 min	1N Background	4617803
30 min	Bubble	5933480	146085	0.0195008	0.206358
30 min	Bubble Background	5787395
60 min	1N	9824265	5529596
60 min	1N Background	4294669
60 min	Bubble	6552637	850705	0.153846	1.628
60 min	Bubble Background	5701932
90 min	1N	9306364	5206630
90 min	1N Background	4099734
90 min	Bubble	5822873	443206	0.0851234	0.900777
90 min	Bubble Background	5379667

## Sheet: fun30 ARS305
Time in HU	Area	Value	Bacground Subtracted	Bubble/1N	Normalized to WT 20 min
20 min	1N		9703757	4650364
20 min	1N Background		5053393
20 min	Bubble				ND	ND
20 min	Bubble Background
30 min	1N		9115602	3102332
30 min	1N Background		6013270
30 min	Bubble		14892430	1427200	0.460041	4.86816
30 min	Bubble Background		13465230
60 min	1N		9391151	3345729
60 min	1N Background		6045422
60 min	Bubble		14885240	1890659	0.565096	5.97985
60 min	Bubble Background		12994581
90 min	1N		10635027	4703313
90 min	1N Background		5931714
90 min	Bubble		15233610	2033520	0.432359	4.57523
90 min	Bubble Background		13200090
											WT	sir2	sir2 fun30	fun30
										20'	1	0	0.47		0.044813	0.134425
										30'	3.22	0.21	2.1	4.86816
										60'	4.75	1.62	3.1	5.97985
										90'	3.42	0.9	1.7	4.57

## Sheet: sir2 fun30 ARS305
Time in HU	Area	Value	Bacground Subtracted	Bubble/1N	Normalized to WT 20 min
20 min	1N	14970253	10761145
20 min	1N Background	4209108
20 min	Bubble	5983560	482353	0.0448236	0.474324
20 min	Bubble Background	5501207
30 min	1N	11650244	7053597
30 min	1N Background	4596647
30 min	Bubble	7690877	1387448	0.196701	2.08149
30 min	Bubble Background	6303429
60 min	1N	14492468	9955840
60 min	1N Background	4536628
60 min	Bubble	8484345	2952773	0.296587	3.13849
60 min	Bubble Background	5531572
90 min	1N	17209210	12949734
90 min	1N Background	4259476
90 min	Bubble	7789165	2040665	0.157584	1.66755
90 min	Bubble Background	5748500
