# Supplementary material for: Sir2 and Fun30 regulate ribosomal DNA replication timing via MCM helicase positioning and nucleosome occupancy
Source: eLife. 2025 Jan 20;13:RP97438. doi: 10.7554/eLife.97438 (PMC11745493; doi:10.7554/eLife.97438)
Supplement: Figure 3—source data 3. [file elife-97438-fig3-data3.xlsx]

## Sheet: Quantification
Southern Blot quantification													WT
16747	ARS 1200	subtract background			PIK1					0s	15m		ARS1200 ratio	0s	15m
1	221406	219533			1	221414	220122		ARS 1200	219533	6023.47			1	0.0274376
2	41703.2	39830.7			2	42101.4	40808.6						PIK1 ratio	0s	15m
3	39757.6	37885.1			3	39356.9	38064.1		PIK1	220122	41215			1	0.187238
4	29356.4	27483.9			4	43629.1	42336.3						ARS1200/PIK1	1	0.146539
5	17812.1	15939.6			5	44168.3	42875.5
6	7895.94	6023.47			6	42507.8	41215
background	1872.48				bACKGROUND	1292.75
													sir2
16769 ARS 1200					PIK1					0s	15m		ARS1200 ratio	0s	15m
1	50133.8	48689.7			1	40321.1	39324.4		ARS 1200	48689.7	11184.3			1	0.229705
2	39742	38297.9			2	38418	37421.3						PIK1 ratio	0s	15m
3	210999	209555			3	43443	42446.3		PIK1	39324.4	36038.9			1	0.916452
4	20434.3	18990.2			4	38959.1	37962.5						ARS1200/PIK1	1	0.250646
5	19326.2	17882.1			5	41793.3	40796.6
6	12628.4	11184.3			6	37035.6	36038.9
background	1444.11				bACKGROUND	996.678
													fun30
17256	ars1200				pik1					0s	15m		ARS1200 ratio	0s	15m
1	37267.2	36113.9			1	39360.5	38658.3		ARS 1200	36113.9	10476.6			1	0.290098
2	33407.6	32254.3			2	36327.1	35624.9						PIK1 ratio	0s	15m
3	27780.3	26626.9			3	24889.5	24187.4		PIK1	38658.3	37001.9			1	0.957151
4	23474.9	22321.6			4	32849	32146.8						ARS1200/PIK1	1	0.303085
5	15970.9	14817.6			5	39826	39123.8
6	11629.9	10476.6			6	37704	37001.9
background	1153.34				background	702.163
													sir2 fun30
17257	ARS1200				PIK1					0s	15m		ARS1200 ratio	0s	15m
1	34036.7	32916.6			1	44708.3	42805.5		ARS 1200	32916.6	8800.66			1	0.267362
2	16338.2	15218			2	41969.9	40067						PIK1 ratio	0s	15m
3	8008.7	6888.59			3	40533.9	38631		PIK1	42805.5	35343.2			1	0.825669
4	9146.77	8026.66			4	42062.8	40160						ARS1200/PIK1	1	0.323813
5	8161.24	7041.12			5	40384.4	38481.6
6	9920.77	8800.66			6	37246	35343.2
7	1120.11				bACKGROUND	1902.82

## Sheet: Uncut DNA
Calculations of uncut DNA
Genotype	Ca	rARS 1 h	PIK3	rARS/PIK3	15 to 0 min ratio	rARS relative to WT
WT	0 min	45090.4	35583	1.26719	1	1
WT	15 min	8746.26	44903.5	0.194779	0.15371
sir2	0 min	49624.6	33569.8	1.47825	1
sir2	15 min	12941.1	35049.4	0.369224	0.249771
sir2 fun30	0 min	18853.4	42056.1	0.448292	1	0.353769
sir2 fun30	15 min	6282.26	47082.6	0.133431	0.297642
fun30	0 min	42184.2	40285.9	1.04712	1
fun30	15 min	11005.7	32554	0.338076	0.322863
