# Supplementary material for: Sir2 and Fun30 regulate ribosomal DNA replication timing via MCM helicase positioning and nucleosome occupancy
Source: eLife. 2025 Jan 20;13:RP97438. doi: 10.7554/eLife.97438 (PMC11745493; doi:10.7554/eLife.97438)
Supplement: Supplementary file 1. [file elife-97438-supp1.xlsx]

## Sheet: Table S1
Yeast strains
Strain	Genotype
14141	MATa, his3, leu2, met15, ura3
W1588-4c*	MATa, ade2-1, Can1-100, his3-11,15, leu2-3,112, trp1-1, ura3-1, RAD5+, W303 background
16316	MATa, his3, leu2, met15, ura3, sir2::NAT
16535	MATa, his3, leu2, met15, ura3, hml⍺::HYG
16630	MATa, his3, leu2, met15, ura3, fob1::KanMX, (119 rDNA copies)
16668	MATa, his3, leu2, met15, ura3, hml⍺::HYG, sir2::KanMX
16673	MATa, his3, leu2, met15, ura3, hml⍺::HYG, isw2::NAT, sir2::LEU
16711	MATa, his3, leu2, met15, ura3, fun30::KanMX
16723	MATa, his3, leu2, met15, ura3, irc5::KanMX, sir2::LEU
16724	MATa, his3, leu2, met15, ura3, isw1::KanMX, sir2::LEU
16725	MATa, his3, leu2, met15, ura3, chd1::KanMX, sir2::LEU
16727	MATa, his3, leu2, met15, ura3, fun30::KanMX, sir2::LEU
16728	MATa, his3, leu2, met15, ura3, swr1::KanMX, sir2::HYG
16729	MATa, his3, leu2, met15, ura3, nhp10::KanMX, sir2::LEU
16747	MATa, his3, leu2, met15, ura3, hml⍺::HYG, with MCM2 MNase 3xFlag Tag with KanMx (161 rDNA copies)
16769	MATa, his3, leu2, met15, ura3, hml⍺::HYG, sir2::LEU, with MCM2 MNase 3xFlag Tag with KanMx (152 rDNA copies)
16909	MATa, his3, leu2, met15, ura3, fun30::KanMX, sir2::LEU, hml⍺::HYG
17059	MATa, his3, leu2, met15, ura3, htl1::NAT, sir2::LEU
17061	MATa, his3, leu2, met15, ura3, swp82::NAT, sir2::LEU
17113	MATa, his3, leu2, met15, ura3, hml⍺::HYG, fun30S20AS28A, sir2::LEU (164 rDNA copies)
17114	MATa, his3, leu2, met15, ura3, hml⍺::HYG, fun30S20AS28A, sir2::LEU (166 rDNA copies)
17248	MATa, his3, leu2, met15, ura3, hml⍺:: HYG, fun30::URA
17256	MATa, his3, leu2, met15, ura3, hml⍺::HYG, fun30::NAT, with MCM2 MNase 3xFlag Tag with KanMx (146 rDNA copies)
17257	MATa, his3, leu2, met15, ura3, hml⍺::HYG, sir2::LEU, fun30::NAT, with MCM2 MNase 3xFlag Tag with KanMx (39 rDNA copies)
17263	MATa, his3, leu2, met15, ura3, hml⍺::HYG, sir2::LEU, fun30::URA
17265	MATa, ade2-1, Can1-100, his3-11,15, leu2-3,112, trp1-1, ura3-1, RAD5+, with p306-BrdU-Inc, p403-BrdU-Inc, p405-BrdU-Inc, p404-BrdU-Inc, hml⍺::HYG, W303 background
17271	MATa, ade2-1, Can1-100, his3-11,15, leu2-3,112, trp1-1, ura3-1, RAD5+, with p306-BrdU-Inc, p403-BrdU-Inc, p405-BrdU-Inc, p404-BrdU-Inc, hml⍺::HYG, sir2::KanMX, W303 background
17279	MATa, ade2-1, Can1-100, his3-11,15, leu2-3,112, trp1-1, ura3-1, RAD5+, with p306-BrdU-Inc, p403-BrdU-Inc, p405-BrdU-Inc, p404-BrdU-Inc, hml⍺::HYG, sir2::KanMX, fun30::NAT, W303 background
17281	MATa, ade2-1, Can1-100, his3-11,15, leu2-3,112, trp1-1, ura3-1, RAD5+, with p306-BrdU-Inc, p403-BrdU-Inc, p405-BrdU-Inc, p404-BrdU-Inc, hml⍺::HYG, fun30::NAT, W303 background
17345	MATa, his3, leu2, met15, ura3, hml⍺::HYG, fun30K603R, sir2::LEU
17346	MATa, his3, leu2, met15, ura3, hml⍺::HYG, fun30K603R, sir2::LEU
17476	MATa, his3, leu2, met15, ura3, fob1::KanMX, fun30::HYG, hml⍺::NAT (193 rDNA copies)
17477	MATa,his3, leu2, met15, ura3, fob1::KanMX, fun30::HYG, hml⍺::NAT (152 rDNA copies)
17542	MATa, his3, leu2, met15, ura3, fob1::KanMX, fun30::HYG, hml⍺::NAT (122 rDNA copies)
17548	MATa, his3, leu2, met15, ura3, fob1::KanMX, fun30::HYG, hml⍺::NAT, sir2::LEU (158 rDNA copies)
17549	MATa, his3, leu2, met15, ura3, fob1::KanMX, hml⍺::HYG (198 rDNA copies)
17550	MATa, his3, leu2, met15, ura3, fob1::KanMX, hml⍺::HYG (191 rDNA copies)
17556	MATa, his3, leu2, met15, ura3, fob1::NAT; BY rDNA. S288c fun30::HYG, hml⍺::KanMX, sir2::LEU (35 rDNA copies)
17558	MATa, his3, leu2, met15, ura3, hml𝛼:HYG, MCM2 6xGLY 3xFlag KanMX
17559	MATa, his3, leu2, met15, ura3, hml𝛼:HYG, sir2::NAT MCM2 6xGLY 3xFlag KanMX
17561	MATa, his3, leu2, met15, ura3, fob1::KanMX, hml⍺::HYG, sir2::LEU (177 rDNA copies)
17562	MATa, his3, leu2, met15, ura3, fob1::KanMX, hml𝛼:HYG, sir2::LEU (179 rDNA copies)
17564	MATa, his3, leu2, met15, ura3, fob1::cloNat; BY rDNA S288c, hml𝛼::HYG, sir2::LEU (29 rDNA copies)
EK342**	MATa, his3, leu2, met15, ura3, fob1::NAT; BY rDNA (35 rDNA copies)
EK68**	MATa, Prototroph, fob1::NAT; BY rDNA (180 rDNA copies)
*Strain from Toshi Tsukiyama (Rodriguez et al. 2017)
** Strain from Bonny Brewer and M.K. Raghuraman (Kwan et al. 2023)
