# Supplementary material for: Sir2 and Fun30 regulate ribosomal DNA replication timing via MCM helicase positioning and nucleosome occupancy
Source: eLife. 2025 Jan 20;13:RP97438. doi: 10.7554/eLife.97438 (PMC11745493; doi:10.7554/eLife.97438)
Supplement: Supplementary file 2. [file elife-97438-supp2.xlsx]

## Sheet: Table S2
Primers used
Primers	Sequence (5' to 3')	Comments
5P_c_pro_qPCR	CCATCTATGTCTTCCACACC	5' primer for C-pro qRT-PCR
3P_c_pro_qPCR	GTCATTTACAAGAGGTAGGTCG	3' primer for C-pro qRT-PCR
PDA1_1_F	GCTGCTTCATTCAAACGCCA	5' primer for PDA1 control for C-pro qRT-PCR
PDA1_1_R	CTGGTGGGAGTGCGAAGAAC	3' primer for PDA1 control for C-pro qRT-PCR
Tor2_5p_qPCR	GCACAAAGACCACAAAGTCG	5' primer for TOR2 control for rDNA size qPCR
Tor2_3p_qPCR	GGGGATAGAGAACTAACAAAAGCA	3' primer for TOR2 control for rDNA size qPCR
ARS1200_qPCR_Forward	GAAATACGCTTCAGAGACCC	5' primer for ARS1200 for rDNA size qPCR
ARS1200_qPCR_Reverse	CGGAAATGGCTGATTTTGATTG	3' primer for ARS1200 for rDNA size qPCR
rARS_southern_5prime1	ACTTCAATTTAAGCTATTCTCC	5' primer for ARS1200 probe for Southern Blot
rARS_3Primer_southern_1	TGCAAGTAGCATATATTTCTTG	3' primer for ARS1200 probe for Southern Blot
Pik1_F	GATTCAGCGTCCACAGCTC	5' primer for PIK1 control probe for Southern Blot
Pik1_B	GGTAACCAAATTTATCCTGCACC	3' primer for PIK1 control probe for Southern Blot
downstream_NheI_probe_5P	CTTCTTCCCAGTAGCCTCATC	5' primer for rARS probe for Southern Blot
downstream_NheI_probe_3P	TGCACTTGGCGGAAAGGCC	3' primer for rARS probe for Southern Blot
