# Supplementary figures and images for: Sir2 and Fun30 regulate ribosomal DNA replication timing via MCM helicase positioning and nucleosome occupancy
Source: eLife journal article supplement (doi:10.7554/elife.97438), 2024-06-19

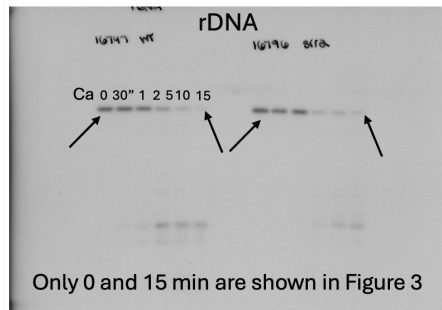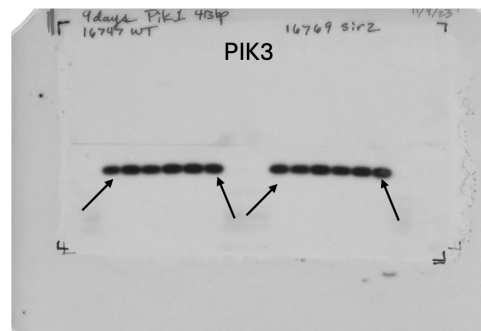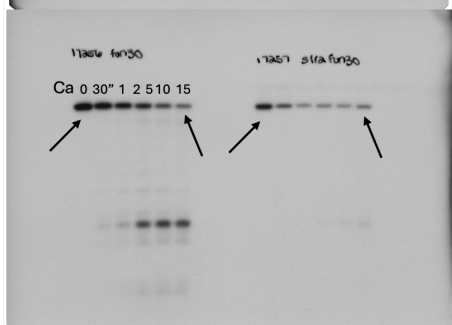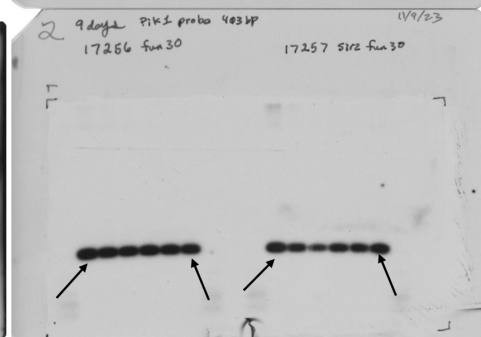

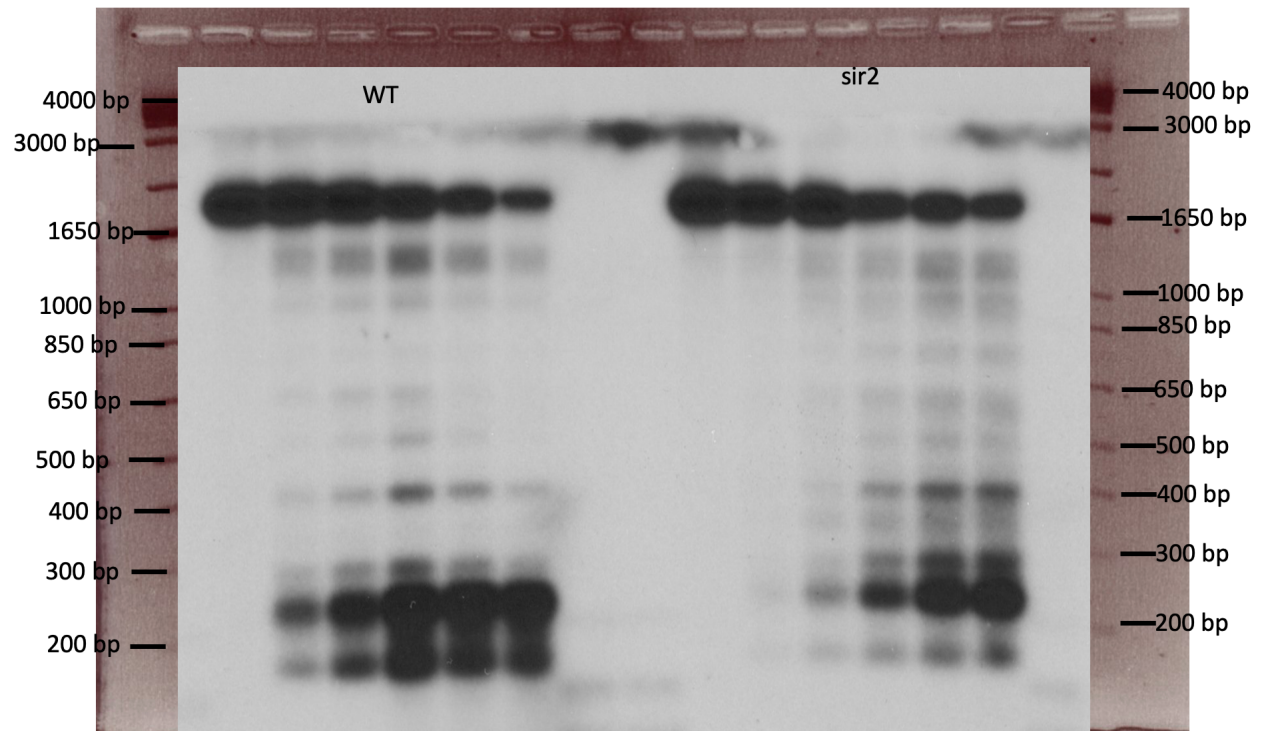

Southern blots overlayed with size markers.

Supplement: fig3-data1 [file elife-97438-fig3-data1-v1.zip]

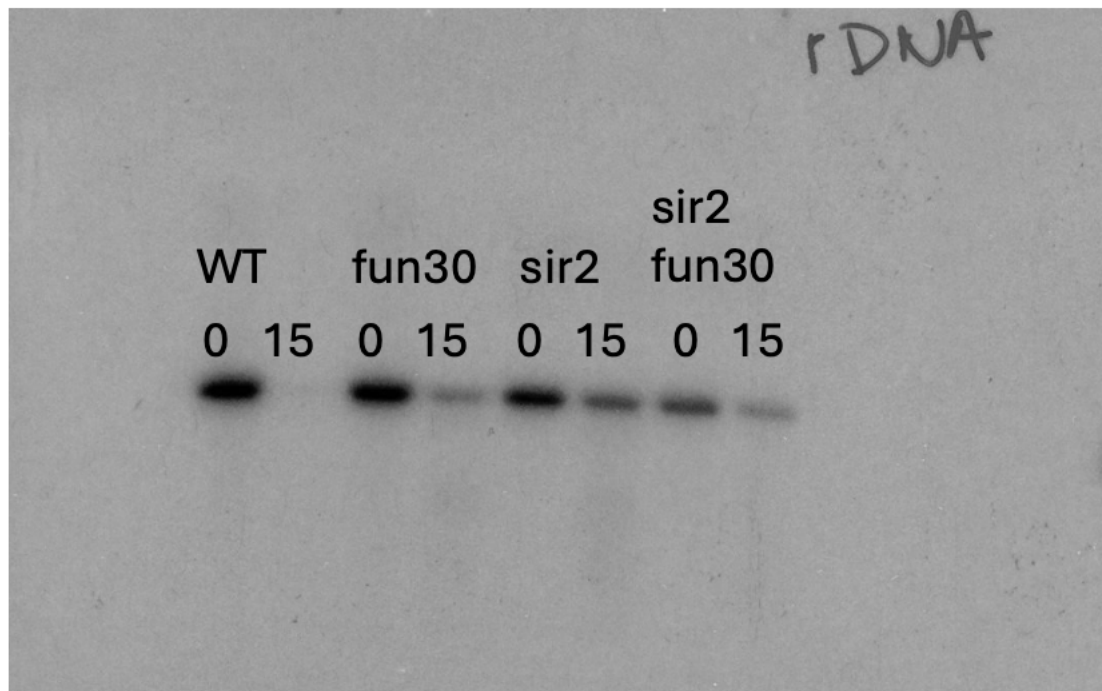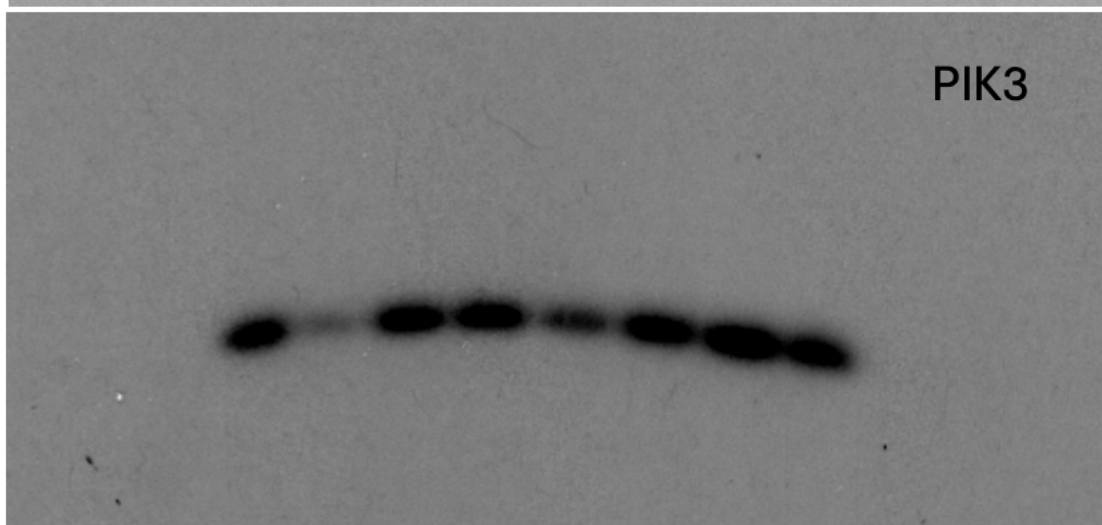

Supplement: fig3-figsupp1-data1 [file elife-97438-fig3-figsupp1-data1-v1.zip]

Replica 1

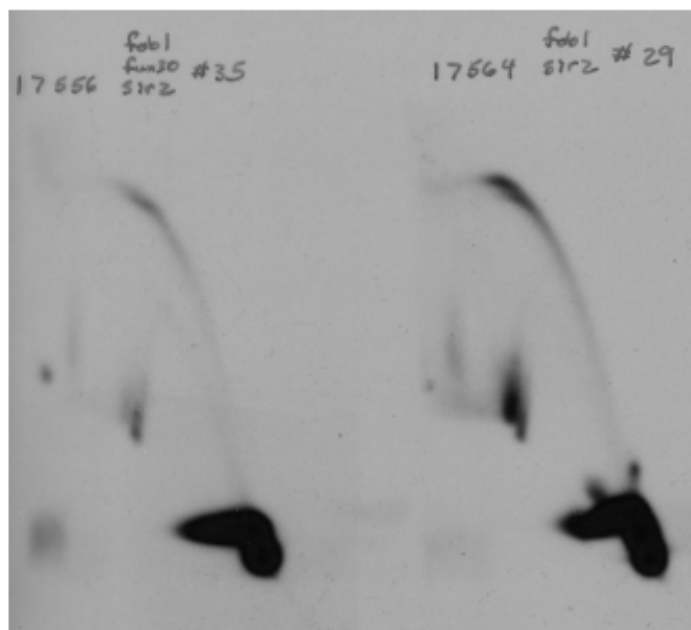

Replica 2

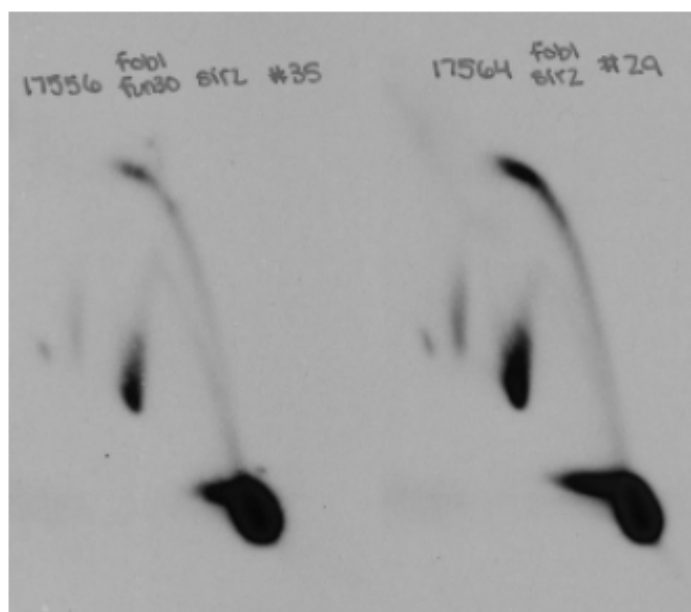

Supplement: fig4-data1 [file elife-97438-fig4-data1-v1.zip]

## rDNA

wt

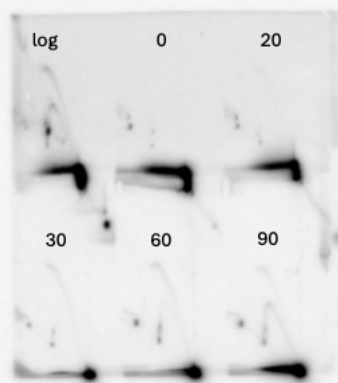

sir2 fun30

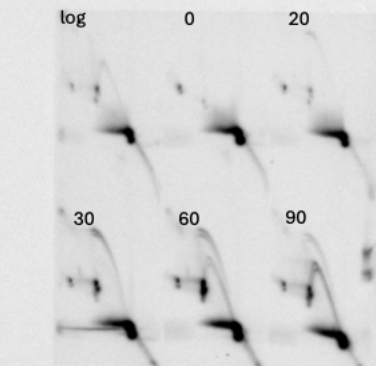

sir2

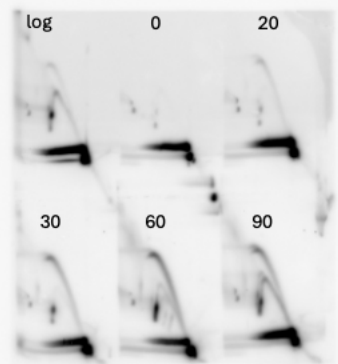

fun30

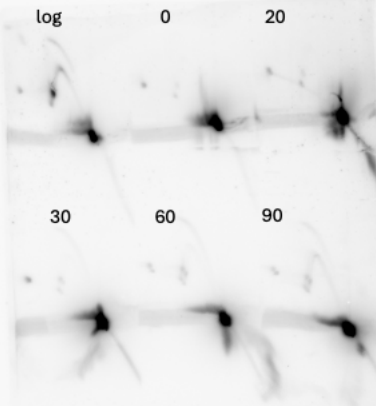

Supplement: fig4-data4 [file elife-97438-fig4-data4-v1.zip]

**ARS305**  
**WT**

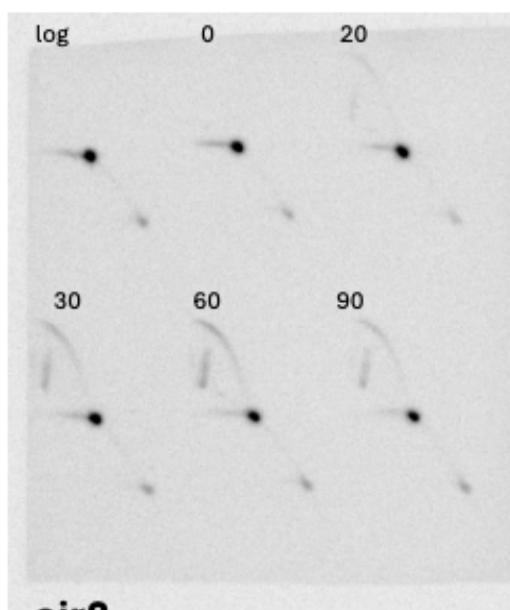

**sir2, fun30**

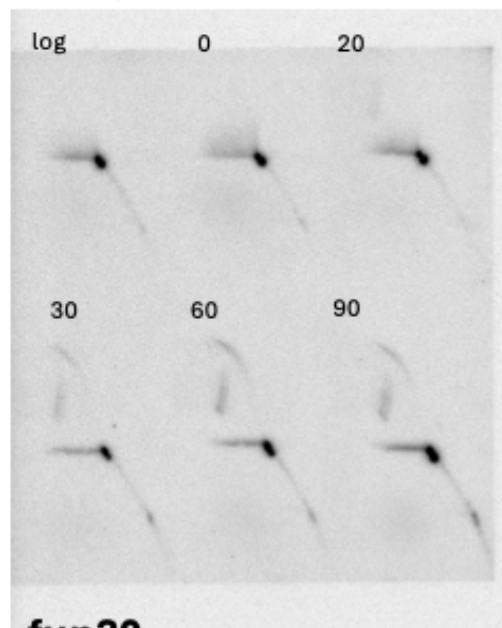

**sir2**

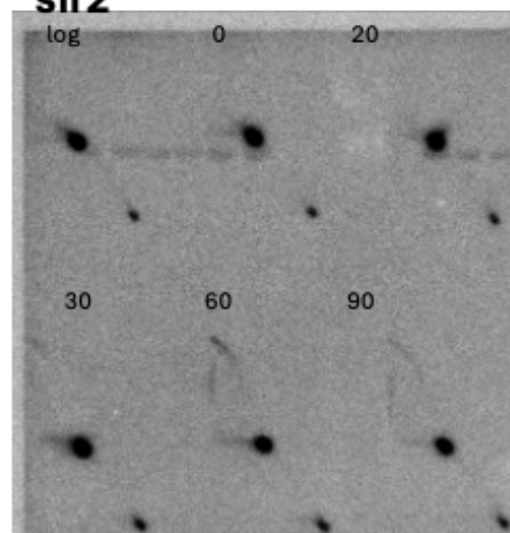

**fun30**

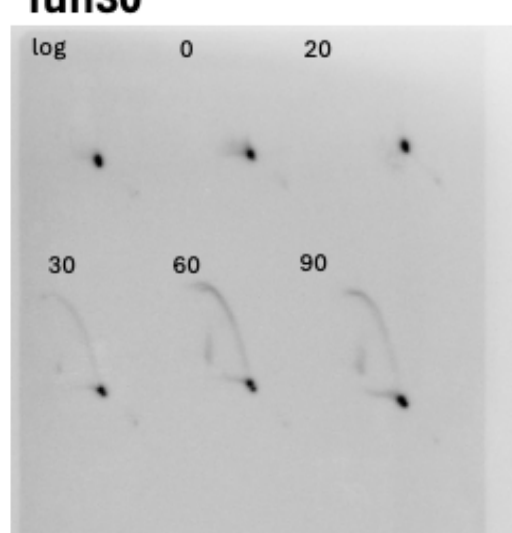

Supplement: fig4-data4 [file elife-97438-fig4-data4-v1.zip]
